# Supplementary material for: Four-fold increase in solar forcing on snow in western U.S. burned forests since 1999
Source: PubMed Central journal article supplement (PMC6497640; doi:10.1038/s41467-019-09935-y), 2019-05-02
Supplement: 41467_2019_9935_MOESM1_ESM.pdf [file 41467_2019_9935_MOESM1_ESM.pdf]

## Supplementary Information

Four-fold increase in solar forcing on snow in western U.S. burned forests since 1999

Gleason et al.

Supplementary Table 1. Research sites represented a chronosequence of burned forests in seasonal snow, and were located in headwaters of the major western US rivers.

| <b>Fire ID</b>       | <b>Year burned</b> | <b>Years-since-fire</b> | <b>State</b> | <b>River Basin</b> | <b>Lat.</b>       | <b>Lon.</b>        | <b>Sample day 2017</b> |
|----------------------|--------------------|-------------------------|--------------|--------------------|-------------------|--------------------|------------------------|
| Cliff Creek          | 2016               | 1                       | WY           | Columbia           | 43°14'2<br>5.37"N | 110°29'3<br>8.28"W | 22 Mar                 |
| West Fork            | 2013               | 4                       | CO           | Colorado           | 37°34'1<br>9.41"N | 106°47'5<br>6.18"W | 27 Mar                 |
| Church Camp          | 2012               | 5                       | UT           | Colorado           | 39°54'2<br>5.10"N | 110°41'5<br>6.94"W | 29 Mar                 |
| Horsethief<br>Canyon | 2012               | 5                       | WY           | Columbia           | 43°25'1<br>7.17"N | 110°45'2<br>1.56"W | 23 Mar                 |
| Bull                 | 2010               | 7                       | WY           | Columbia           | 43°18'1<br>8.98"N | 110°31'1<br>7.03"W | 24 Mar                 |
| Mato Vega            | 2006               | 11                      | NM           | Rio<br>Grande      | 35°36'2<br>7.2"N  | 105°15'1<br>3.73"W | 26 Mar                 |
| Price Canyon         | 2002               | 15                      | UT           | Colorado           | 39°46'3<br>8.37"N | 110°54'6<br>.66"W  | 28 Mar                 |
